# Supplementary material
Source: Springer Nature journal article supplement (https://www.springermedizin.de/resource/supplementary/12885_2010_2200_MOESM5_ESM.pdf/9460746)

# *CBL*

**a**

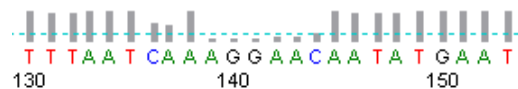

HD-0264

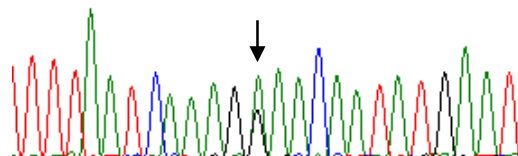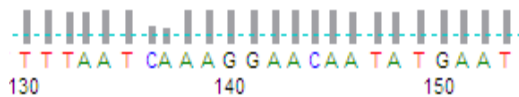

Not-mutated

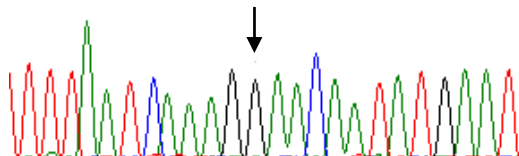

# *IDH2*

**b**

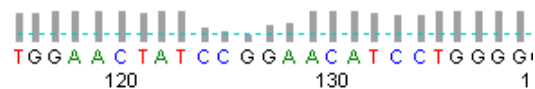

HD-0104  
Blood

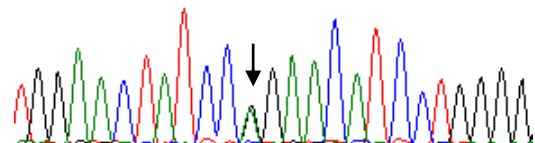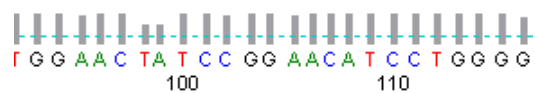

HD-0104  
Buccal smear

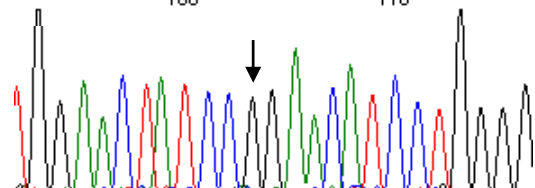

Supplement: MOESM5 [file 9460746]
